# Supplementary figures and images for: Macrophage Phenotype in Combination with Tumor Microbiome Composition Predicts RCC Patients’ Survival: A Pilot Study
Source: MDPI journal article supplement (doi:10.3390/biomedicines10071516), 2022-06-27

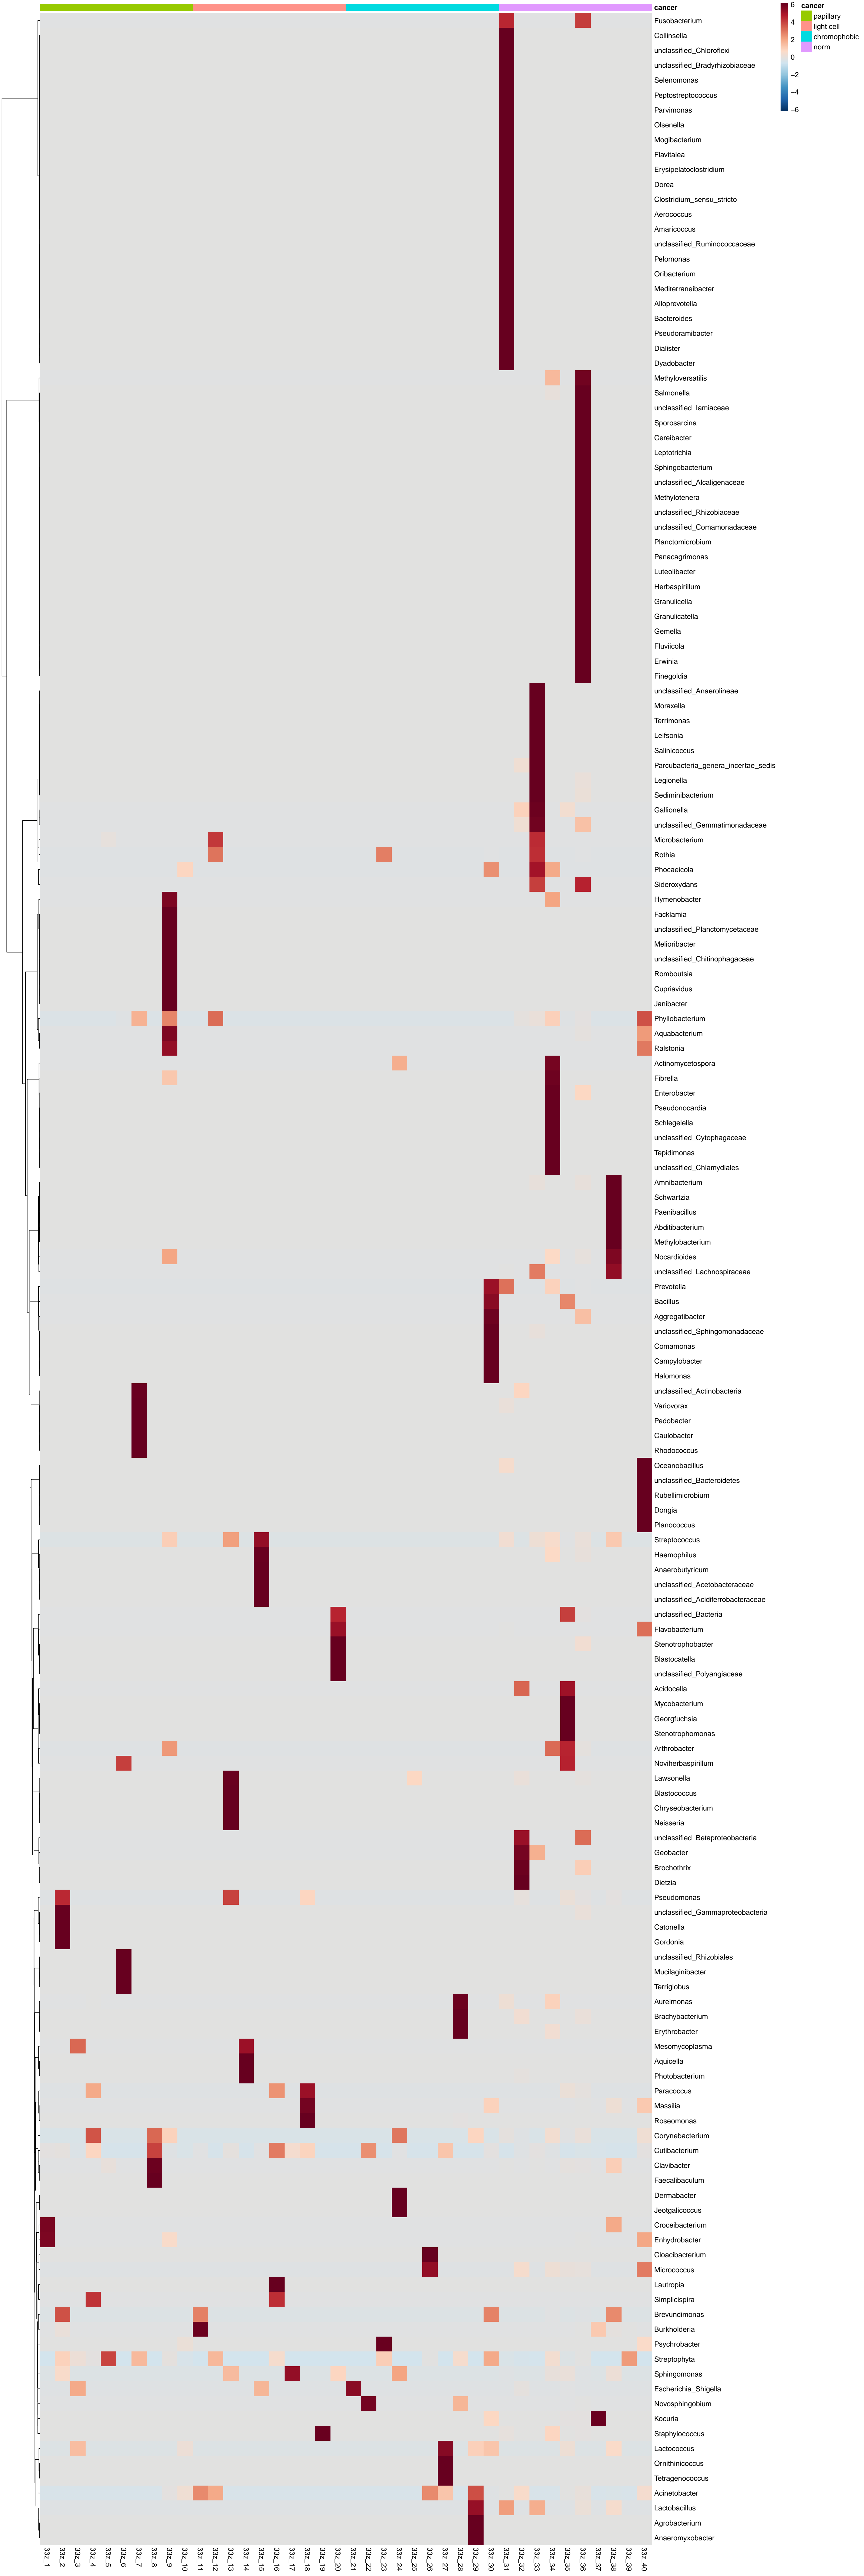

Supplement: s1 [file s1]

## Volcano plot

EnhancedVolcano

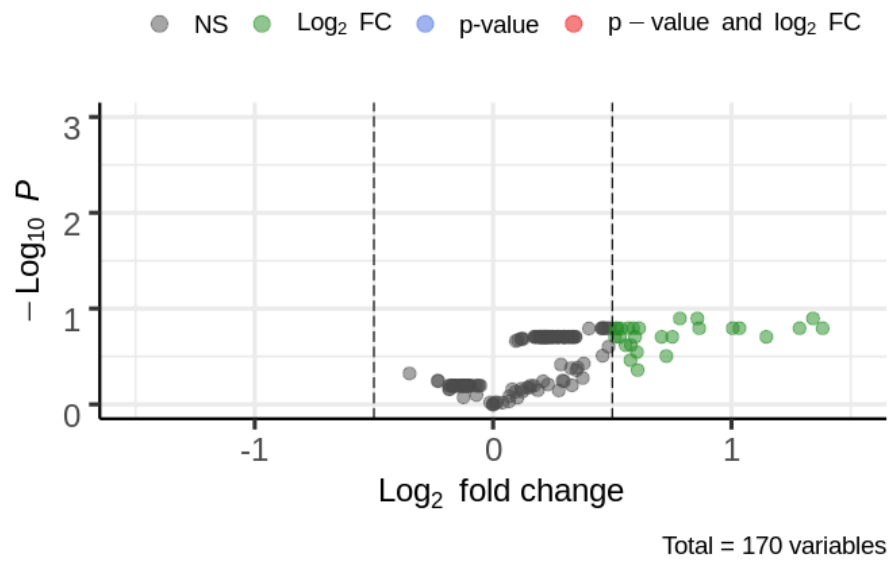

Supplementary figure S2. Volcano plot of 16S sequencing results.

Supplement: s1 [file s1]
